# Supplementary material for: Clusterin Inhibition Using OGX-011 Synergistically Enhances Hsp90 Inhibitor Activity by Suppressing the Heat Shock Response in Castrate-Resistant Prostate Cancer
Source: Oxford University Press journal article supplement (doi:10.1158/0008-5472.can-11-0994), 2011-07-08
Supplement: 00085472can110994-sup-figure_legend_s1_pdf_138kb.pdf [file 00085472can110994-sup-figure_legend_s1_pdf_138kb.pdf]

### **Legend**

**Figure S1. Clusterin protects tumor cells to Hsp90 inhibitors via a regulation of HSF-1.** *A*, PC-3 cells were transfected to overexpress CLU compared to wt-PC-3 and treated with indicated concentrations of PF-04928473 for 48h. Cell growth was determined by crystal violet and compared with control. \*\*,  $p \leq 0.01$ . *B*, tumor cells were treated with 20nM HSF-1 siRNA vs control Scr siRNA and treated with 1 $\mu$ M PF-04928473 for 48h. Total proteins were extracted and, western blotting and caspase-3/7 activity were performed. *C*, PC-3 cells were treated with 20nM CLU siRNA vs control Scr siRNA and treated with 1 $\mu$ M 17-AAG for 24h. HSF-1 localization was assessed by immunofluorescence staining.
